# 1 Reconstructing the transcriptional 2 ontogeny of maize and sorghum 3 supports an inverse hourglass model of 4 inflorescence development

## 5 Authors

6 Samuel Leiboff and Sarah Hake

## 7 Highlights

- 8 • Transcript dynamics identify maize tassel and sorghum panicle developmental stages
- 9 • Random forest predicts developmental age by gene expression, providing molecular  
10 markers and an *in silico* staging application
- 11 • Maize and sorghum inflorescences are most similar when committing stem cells to a  
12 determinant fate
- 13 • Expression conservation identifies hourglass-like stage, but transcriptomes diverge,  
14 similar to 'inverse hourglass' observations in cross-phyla animal embryo comparisons

## 15 Keywords

16 Maize genetics  
17 Sorghum inflorescence  
18 Comparative transcriptomics  
19 Developmental hourglass  
20 Evolution of development (Evo-devo)  
21 Phylostratigraphy

## 22 Abstract

23 Assembling meaningful comparisons between species is a major limitation in studying the  
24 evolution of organismal form. To understand development in maize and sorghum, closely-  
25 related species with architecturally distinct inflorescences, we collected RNAseq profiles  
26 encompassing inflorescence body plan specification in both species. We reconstructed  
27 molecular ontogenies from 40 B73 maize tassels and 47 BTx623 sorghum panicles and  
28 separated them into transcriptional stages. To discover new markers of inflorescence

29 development, we used random forest machine learning to determine stage by RNAseq. We  
30 used two descriptions of transcriptional conservation to identify hourglass-like developmental  
31 stages. Despite short evolutionary ancestry of 12 million years, we found maize and sorghum  
32 inflorescences are most different during their hourglass-like stages of development, following an  
33 'inverse-hourglass' model of development. We discuss if agricultural selection may account for  
34 the rapid divergence signatures in these species and the observed separation of evolutionary  
35 pressure and developmental reprogramming.

## 36 Introduction

37 The generation of diverse organismal body plans has piqued the imagination of early naturalists  
38 and modern geneticists alike. By observing sets of intermediate developmental stages, or  
39 ontogenies, early embryologists Haeckel and von Baer not only associated the body plans of  
40 diverse species, but also placed morphological differences into the context of evolutionary  
41 relationships between taxa (Gould, 2003). Developmental genetic research has since revealed  
42 that morphogenesis generally involves a transition from a highly-proliferative stem cell identity  
43 into a determinant, mature tissue identity. By precisely regulating the duration and location of  
44 these two modes of development, multicellular eukaryotic lineages have generated complex,  
45 diverse body plans (Carroll, 2008; Minelli, 2009; Steeves and Sussex, 1972). Uncovering the  
46 molecular changes associated with the evolution of body plans underlying morphological  
47 diversity has been challenging, however, because it is difficult to determine meaningful  
48 comparisons between developmental stages of distant taxa (Roux et al., 2015), especially in  
49 understudied or morphologically ambiguous species (Anavy et al., 2014).

50  
51 Our current understanding of the evolution of development has instead focused on the genetics  
52 of interfertile taxa and/or comparative genomics of species with shared morphological staging  
53 (Carroll, 2008). In systems where morphologically unique taxa are interfertile, for example, wild  
54 relatives of agricultural domesticates or allopatric species distributions, researchers have used  
55 quantitative genetics to identify mutations and even possible mechanisms underlying mutation  
56 rates that underlie morphological diversification (Hubbard et al., 2002; Jones et al., 2012; Studer  
57 et al., 2011; Xie et al., 2019). Many of these mutations provide new regulatory information for  
58 genes with important morphogenetic activity. Species which are not interfertile, but still share  
59 similar morphological staging during development can be compared with genomics techniques.  
60 For example, Lemmon et al. used morphological queues to synchronize developmental stages  
61 across species from the Solanaceae and compare transcriptomic profiles between and within

62 genera (Lemmon et al., 2016). Comparative expression profiling approaches have similarly  
63 found that changes to the timing of expression are correlated with morphological changes (Roux  
64 et al., 2015).

65  
66 Maize (*Zea mays* subsp. *mays* L.) and sorghum (*Sorghum bicolor* [L.] Monech) are two closely  
67 related cereal grains of global agricultural significance. Both members of the tribe  
68 Andropogoneae, sorghum and maize shared a common ancestor 12-16 million years ago,  
69 reflected in their extensive genomic synteny, with more than 11,000 identified maize-sorghum  
70 syntenic orthologs (Zhang et al., 2017). Despite this genomic similarity, maize and sorghum  
71 have distinct terminal inflorescence architectures, leading to differences in their agricultural use  
72 and possibly reflecting differences in their speciation/domestication histories (Lai et al., 2017;  
73 Lin et al., 2012). While much is known about the genetic underpinning of tassel morphogenesis  
74 in maize, little of that information has been applied to understanding the sorghum panicle,  
75 perhaps due to its morphological complexity (Vollbrecht et al., 2005). As interest in sorghum as  
76 a drought-tolerant biofuel and animal feed grows (Ahmad Dar et al., 2018), generating elite plant  
77 architectures will require an improved understanding of inflorescence gene function (Morris et  
78 al., 2013; Zhou et al., 2019).

79 Here, we present a comparative ontogeny of terminal inflorescence development in closely  
80 related grasses with morphologically unrelatable stages. By collecting individual transcriptomes  
81 from immature maize tassels and sorghum panicles throughout development, we reconstructed  
82 the transcriptional ontogeny of both species and correlated the appearance of species-specific  
83 morphological characteristics with molecularly-defined developmental stages. Examining the  
84 relative timing and sequence of known genetic master regulators from maize and their syntenic  
85 orthologs in sorghum revealed that extended tissue indeterminacy in sorghum results from the  
86 prolonged and/or heterochronic activity of multiple proliferative tissue types. We detected high  
87 transcriptional similarity between maize and sorghum during floral meristem formation,  
88 representing the termination of indeterminate, proliferative pluripotent growth. Measuring  
89 selective signatures during maize and sorghum inflorescence ontogeny detected hourglass-like  
90 mid-transition stages for each species. Despite their relatively small evolutionary distance,  
91 comparing the hourglass-like stage from each species identified their least similar transcriptional  
92 phase, providing evidence of an inverse hourglass between maize and sorghum inflorescence  
93 development.

## 94 Results

95 During the formation of grass inflorescences, the pluripotent stem cells that make up the shoot  
96 apical meristem (SAM) undergo a series of proliferative tissue identity changes from  
97 indeterminate inflorescence meristems (IMs) and branch meristems (BMs), to less determinant  
98 spikelet pair meristems (SPMs) and spikelet meristems (SMs), finally terminating in completely  
99 determinant floral meristems (FMs), where all remaining stem cell initials are consumed to  
100 produce floral organs (Kellogg et al., 2013; Thompson, 2014). In maize, these stem cell identity  
101 transitions have been established by combined morphological and genetic examination of  
102 master regulatory genes (Bortiri et al., 2006; Chuck et al., 2002, 2014; Chuck and Bortiri, 2010;  
103 Eveland et al., 2014; Gallavotti et al., 2010; Thompson et al., 2009; Vollbrecht et al., 2005).  
104 Although there is extensive genomic synteny between maize and sorghum (Schnable et al.,  
105 2011; Zhang et al., 2017), inflorescence development in sorghum is sufficiently complex to be  
106 morphologically unrecognizable from maize development, a difference generally attributed to  
107 increased indeterminacy (Vollbrecht et al., 2005). We therefore used a comparative  
108 transcriptomic approach to assemble and compare complete inflorescence ontogenies for both  
109 species.

110 We collected individual RNAseq profiles from 40 maize tassels, inbred B73 (Figure 1A) and 47  
111 sorghum panicles, inbred BTx623 (Figure 1B) spanning the establishment of all major  
112 architectural features. From these transcriptional profiles, we calculated complete expression  
113 trajectories for each species using a smoothing-spline pseudotime metric, developmental time  
114 units (DTUs). We then used these expression trajectories to interpolate expression values  
115 between samples and reconstruct complete molecular ontogenies (Methods; Figure 1C-F).  
116 Hierarchical clustering identified 5 transcriptional stages of maize tassel development, ZM1-ZM5  
117 (Figure 2AB) and 4 transcriptional stages of sorghum panicle development, SB1-SB4 (Figure  
118 2CD), sorted by DTU value.

119 During tissue collection, we imaged each individual inflorescence primordium, allowing the  
120 correlation of specific morphological characteristics with transcriptional phenomena (Figure  
121 2BD). We found that our 5 maize transcriptional stages predicted the successive, acropetal  
122 (bottom-to-top) production of genetically-established meristem types, IM, BM, SPM, SM, and  
123 FM, from most indeterminate to most determinant (Figure 2B; Figure 2 Supplemental figure 1).  
124 The compound, high-order branching pattern of the sorghum inflorescence makes the panicle  
125 more spatially complex than the tassel, but stage-wise estimates of sorghum meristem type

126 abundance matched our maize data (Figure 2D). In contrast to our maize data where the IM  
127 was observed from ZM1-ZM3, the sorghum IM was a short-lived identity found only during SB1.  
128 Subsequent meristem types appeared in a loosely basipital (top-to-bottom) sequence in  
129 sorghum (Figure 2 Supplemental figure 1).

130 Our calculated psudeotime metric, DTU, was tightly correlated with calendar plant age and  
131 overall primordia length, a common proxy for developmental stage (Figure 3A-D). However, we  
132 found that the relationship between DTU and sorghum panicle length could best be summarized  
133 by two piecewise linear regressions (Figure 3D), one for early panicle development (SB1-SB3)  
134 and one for late panicle development (SB3-SB4). Expression of maize meristem tissue identity  
135 genes, *faciated ear4* (*FEA4*; Pautler et al., 2015), *unbranched2* (*UB2*; Chuck et al., 2014),  
136 *ramosa1* (*RA1*; Vollbrecht et al., 2005), *branched silkless1* (*BD1*; Chuck et al., 2002), and  
137 *bearded ear1* (*BDE1/ZAG1*; Thompson et al., 2009) peaked in our dataset at DTU values that  
138 match known effects on tissue identity and published expression patterns (Figure 3E). The  
139 sorghum syntenic orthologs of these master regulator genes also predicted the appearance of  
140 different meristem types, although expression was notably shifted when comparing the two  
141 species (Figure 3F).

142 To identify new molecular markers of inflorescence development in maize and sorghum, we  
143 employed a random forest machine learning approach that constructed decision trees based on  
144 a randomly chosen subset of gene expression values. After 2000 iterations, we calculated the  
145 informative value of each gene in predicting DTU, as a representation of developmental age.  
146 We took the top 3000 most informative genes from both maize and sorghum and clustered their  
147 expression profiles by self-organizing maps to identify stage-specific expression patterns  
148 (Figure 4A; Figure 4 Supplemental figure 1; Figure 4 Supplemental figure 2; Supplemental file  
149 3). We then used our entrained random forest to evaluate a small number of publicly-available,  
150 developmentally-staged whole tassel primordia RNAseq datasets. Using just the raw expression  
151 values from these datasets, we were able to correctly approximate primordia length, and thus  
152 calculate organ primordia age *in silico*, from RNAseq alone for 5 of 6 available datasets (Figure  
153 4B).

154 After observing that the syntenic orthologs of maize meristem genes appeared shifted in our  
155 sorghum panicle dataset, we explored whether these shifts represent (1) differences in the  
156 relative age of sampled plants, or (2) real changes in the timing of expression, heterochrony.

157 First we constructed phasigrams of gene expression, where genes are ordered based on their  
158 time of peak expression (Methods, after Levin et al., 2016). Comparing the absolute position of  
159 peak expression confirmed that our sorghum dataset starts and ends relatively early compared  
160 to maize development. However, we found that the overall sequence of meristem regulatory  
161 genes and their syntenic orthologs was not changed between maize and sorghum (Figure 5AB).  
162 Specific regulators associated with maize tassel development, however, did show differences in  
163 relative timing, resembling heterochrony. For example, the regulators of maize tassel branch  
164 number and complexity, *liguleless1* (*LG1*; Lewis et al., 2014) and *ramosa3* (*RA3*; Satoh-  
165 Nagasawa et al., 2006) appeared out-of-sequence, peaking later in sorghum development  
166 relative to other maize inflorescence genes. Conversely, *thick tassel dwarf1*, a negative  
167 regulator of inflorescence meristem proliferation (*TD1*; Bommert et al., 2005), peaked much  
168 earlier in sorghum development relative to maize, mirroring observations of an active IM across  
169 maize stages ZM1-ZM3 but only to the earliest SB1 stage in sorghum (Figure 2BD). We were  
170 surprised that cloned inflorescence genes displayed a limited signature of heterochrony.

171 To discover new genes with heterochronic expression patterns we directly compared the  
172 expression profiles of maize-sorghum gene syntenic orthologs detected in our dataset through a  
173 dynamic time warping (DTW) profile-alignment metric (Giorgino, 2009). DTW compares  
174 expression profiles, allowing gaps, compression, and expansion of one gene expression profile  
175 in order to fit another (Figure 5C). Genes with low DTW distances have similar expression  
176 profiles, even if they are expressed at different absolute times. Genes with high DTW distances  
177 have dissimilar expression profiles and cannot be synchronized by simple translation. Syntenic  
178 maize-sorghum orthologs varied from low to high DTW, with a bias towards low DTW distances  
179 (Figure 5C). We used median absolute deviation normalized DTW scores in a parametric gene  
180 enrichment test to search for enriched GO terms within similar and dissimilar expression profiles  
181 (Supplemental file 4). Genes annotated with GO terms related to DNA replication, regulation of  
182 photosynthesis and other core processes were amongst the most similar between maize and  
183 sorghum inflorescence development (Figure 5D), suggesting that general features of growth are  
184 regulated similarly in maize and sorghum inflorescence development. On the other hand, GO  
185 terms related to adaxial-abaxial specification, secondary metabolism, and PP2A complex were  
186 enriched in the most dissimilar maize-sorghum gene expression comparisons, suggesting that  
187 floral organ programs are amongst the most heterochronic expression patterns between  
188 species.

189 To assess global similarities in gene expression, we limited our gene expression dataset to  
190 syntenic maize-sorghum orthologs, divided each reconstructed developmental expression  
191 profile into 1000 time points, and calculated Pearson correlation between maize and sorghum  
192 inflorescence development in all pairwise combinations (Figure 6A). By comparing the full  
193 trajectory of gene expression during maize tassel and sorghum panicle development, we  
194 detected continuous transcriptional similarity between maize and sorghum. We found low  
195 transcriptional similarity during the appearance of spikelet pair meristems in maize and peak  
196 branch meristem abundance in sorghum (ZM2, SB2) and high similarity during floral meristem  
197 accumulation in both species (ZM4, SB3; Figure 6A). Maize and sorghum inflorescence  
198 development are least similar when comparing ZM4, marked by high floral meristem abundance  
199 to SB2, marked by peak branch meristem abundance (Figure 6A). We further used this  
200 similarity to assemble a linear relationship between maize tassel and sorghum panicle  
201 developmental stages (Figure 6B).

202 Developmental expression profiling has revealed that animal, fungal, and plant transcriptomes  
203 exhibit signatures of a 'developmental hourglass' where the 'hourglass-like' stage is enriched for  
204 the expression of anciently-conserved genes (Cheng et al., 2015; Drost et al., 2015; Quint et al.,  
205 2012). This hourglass-like stage coincides with the establishment of an organism's body plan  
206 and is morphologically conserved within closely-related species. Seeking to understand the  
207 source of maize and sorghum morphological differences from our transcriptomic data, we used  
208 an evolutionary transcriptomics approach to explore whether there is an analogous  
209 'developmental hourglass' during maize and sorghum inflorescence development.

210 We employed two approaches to understand transcriptional conservation. We combined  
211 phylostratigraphy, where the ancestry of maize peptides was inferred by protein BLASTs  
212 against a representative set of 216 plant, animal, and bacterial genomes with our developmental  
213 transcriptomes to produce a transcriptional age index, TAI (Arendsee et al., 2019; Drost et al.,  
214 2018; Quint et al., 2012). In parallel, we determined the conservation of maize or sorghum  
215 codons by calculating Ka/Ks in reciprocal best-BLAST-hits against the *Setaria italica* genome in  
216 a codon divergence stratigraphy approach to determine a transcriptional divergence index or  
217 TDI (Drost et al., 2018; Quint et al., 2012). Across maize tassel development, TAI and TDI  
218 fluctuated significantly, with an increased contribution of anciently-conserved genes during high  
219 floral meristem abundance detected by both phylostratigraphy and codon divergence  
220 stratigraphy (ZM4; Figure 6C). The relative increase in ancient gene activity was driven by the  
221 expression of genes shared amongst all green plants (Streptophyta, Viridiplantae) as well as

222 gene modules shared amongst most monocots (Petrosalviidae, commelinids, Poales; Figure 6  
223 Supplemental figure 1). However, the absolute expression value of maize-specific and  
224 Andropogoneae-specific genes was greater than all other strata at all maize tassel  
225 transcriptional stages (ZM1-5; Figure 6 Supplemental figure 1). Across sorghum panicle  
226 development, we detected a significant increase in ancient-conserved genes shared amongst  
227 monocots (Liliopsida, Petrosaviidae, commelinids) with a less prominent contribution from  
228 genes shared amongst all green plants (Viridiplantae, Streptophyta, Embryophyta; Figure 6  
229 Supplemental figure 1) during the proliferative branching stage (SB2). As seen in maize,  
230 absolute expression values were dominated by sorghum-specific and Andropogoneae-specific  
231 transcripts during all sorghum panicle stages (SB1-4; Figure 6 supplemental figure 1).

232 Although we detected hourglass-like signatures of purifying selection of transcriptional programs  
233 in maize tassel stage ZM4 and sorghum panicle stage SB2, morphological comparisons  
234 suggest that these stages are not analogous, with ZM4 representing the specification of  
235 determinant floral meristem identity and SB2 comprised of highly indeterminate compounding  
236 branch meristems (Figure 2CD). And while transcriptional stages, ZM4 and SB3 exhibited high  
237 Pearson correlation, our putative hourglass-like stages, ZM4 and SB2 display low Pearson  
238 correlation, matching expectations for a developmental ‘inverse hourglass’ normally detected in  
239 distant species with dissimilar body plans (Lemmon et al., 2016; Levin et al., 2016; Yanai,  
240 2018).

## 241 Discussion

242 As a way of understanding the similarity of the middle stages of vertebrate embryogenesis,  
243 Duboule’s concept of the phylotypic egg timer, also known as the ‘developmental hourglass’,  
244 pointed to mechanistic constraints on development as a source of shared morphology (Duboule,  
245 1994). Duboule proposed that the linked, tightly regulated clusters of colinearly-expressed HOX  
246 genes force vertebrate embryos into a similar body plan. Strong selection for this developmental  
247 mechanism and the body plan it produces thus underlie the similarity in limb-bud stage of  
248 development in both zebrafish and mice, vertebrates that shared an ancestor more than 400  
249 MYA. Exploring the embryonic mid-transition of closely-related animal species has found  
250 genome-wide molecular evidence for a conserved transcriptional program within phyla, where  
251 the activity of evolutionarily-conserved genes establishes characteristic body plan features  
252 shared within the phylum and is maintained by strong purifying selection at the ‘hourglass-like’



253 stage (Anavy et al., 2014; Drost et al., 2015; Kalinka et al., 2010; Levin et al., 2012). Simulations  
254 of gene network evolution suggest that changes to developmental pathways can quickly define  
255 an hourglass-like stage through the loss of expression of formerly-interacting genes (Akhshabi  
256 et al., 2014). Duboule suggested that insects, which share a common ancestor with vertebrates  
257 at least 530 MYA, do not experience this same developmental constraint because insect  
258 lineages have multiple HOX clusters that are not globally, colinearly expressed and thus insect  
259 and vertebrate embryogenesis is morphologically and mechanistically distinct (Duboule, 1994).

260 While a transitional stage between stem cell proliferation and tissue patterning is detectable  
261 across diverse taxa, broad comparisons between metazoan phyla (Levin et al., 2016), plant  
262 species within the same family (Lemmon et al., 2016), or between animals, fungi, and plants  
263 (Cheng et al., 2015; Drost et al., 2015; Quint et al., 2012), reveal that although hourglass-like  
264 mid-transition patterns of conservation can be detected, evolutionarily-distant taxa have  
265 dissimilar mechanisms regulating the mid-transition. Wide transcriptomic and morphometric  
266 comparisons of anciently diverged taxa have thus lead to an 'inverse-hourglass' model of cross-  
267 phyla development, where the greatest dissimilarity between species is detected by comparing  
268 their unique 'phylotypic' mid-transitions, with very few developmental mechanisms conserved at  
269 the mid-transition across phyla (Levin et al., 2016).

270 Maize and sorghum, as members of the tribe Andropogoneae, are estimated to have shared a  
271 common ancestor as early as 12 MYA. The maize tassel and sorghum panicle share  
272 characteristic morphological features, including a branched inflorescence terminating in short  
273 paired spikelet branches bearing paired florets. These features are shared amongst the  
274 Andropogoneae and other grasses (Kellogg et al., 2013). In this study we detected clear  
275 continuous linear transcriptomic correlations between maize tassel and sorghum panicle  
276 developmental stages, suggesting that the bulk of their developmental activities are shared.  
277 Despite these general similarities in body plan, short evolutionary history, and correlated  
278 expression patterns, phylostratigraphy and codon divergence stratigraphy suggest that a  
279 relatively short history of selective pressures have allowed the hourglass-like stage to reposition  
280 in either or both of these species (Figure 7A). Without knowing the expression dynamics of their  
281 common ancestor, or a comprehensive panel of other grasses, we cannot determine whether  
282 maize-like selective pressure on FM specification or sorghum-like selection on BM  
283 indeterminacy marked their last shared ancestor. Indeed, the last ancestor of maize and  
284 sorghum may have exhibited a completely different hourglass-like stage of inflorescence  
285 development. In any case, our findings suggest that selective pressures have acted differently

286 on maize and sorghum, leading to a change in the hourglass-like signature of selection  
287 independent of developmental diversification (Figure 7B).

288 We wondered if domestication, which acts as a strong allelic bottleneck that rapidly changes  
289 morphology, could be the driving force behind the observed differences in the maize and  
290 sorghum inflorescence hourglass-like stage. We searched for enrichment of genes associated  
291 with maize domestication (Hufford et al., 2012) amongst our calculated phylostrata and codon  
292 divergence strata, but did not find a significant enrichment in any stratum (Supplemental file 5),  
293 suggesting that maize domestication does not play a significant role in defining the maize  
294 hourglass-like stage. Additional investigations into the genome-wide signatures of domestication  
295 in sorghum would allow us to further determine whether agricultural selection is sufficiently  
296 powerful to reprogram the developmental hourglass without disturbing global molecular  
297 ontogeny.

## 298 Conclusion

299 By collecting individual transcriptional profiles that span inflorescence maturation, we  
300 reconstructed a complete molecular ontogeny of maize tassel and sorghum panicle  
301 development. We used our molecular ontogeny to identify 5 maize tassel and 4 sorghum  
302 panicle developmental stages. These stages correlated with quantitative morphological  
303 signatures of tissue identity, although sorghum and maize inflorescence displayed different  
304 spatial distributions of tissues.

305 As seen in models trained to identify novel biomarkers (Scheubert et al., 2011), we were able to  
306 use machine learning (ML) algorithms to identify important transcriptomic features. That the  
307 entrained model is able to perform *in silico* sample staging with other RNAseq data suggests  
308 that carefully prepared ML models might one day allow naive users to characterize samples with  
309 the same precision.

310 Although our transcriptional data identified widespread molecular similarities in maize tassel and  
311 sorghum panicle development, a known regulator of determinacy, *RA3*, and stem cell  
312 homeostasis, *TD1*, are not expressed in a shared pattern during inflorescence development in  
313 both species. Our data support earlier reports that increased indeterminacy via heterochrony is  
314 correlated with the high-order branching of the sorghum panicle, compared to the maize tassel  
315 (Vollbrecht et al., 2005), but that this process is mediated by few known master regulatory

316 genes. The genome-wide characterization of heterochrony by dynamic time warping (DTW)  
317 promises to reveal new genes underlying morphological differences in maize and sorghum  
318 inflorescences.

319 By identifying hourglass-like stages in maize tassel and sorghum panicle development we show  
320 that developmental hourglass patterns of embryonic similarity may be applicable to post-  
321 embryonic phases of plant development, along with development in the seed (Drost et al., 2016;  
322 Quint et al., 2012), supporting a life-long iterative, modular rhythm to plant development (Kaplan  
323 and Cooke, 1997). That we detected changes in hourglass-like selective signatures between  
324 maize and sorghum which were not in agreement with transcriptome-wide similarities suggests  
325 that relatively brief evolutionary pressures may influence hourglass-like signatures while leaving  
326 broad developmental mechanisms intact. These data suggest that forces measured across  
327 phylogeny need not be recapitulated in ontogeny.

328 **FIGURES**

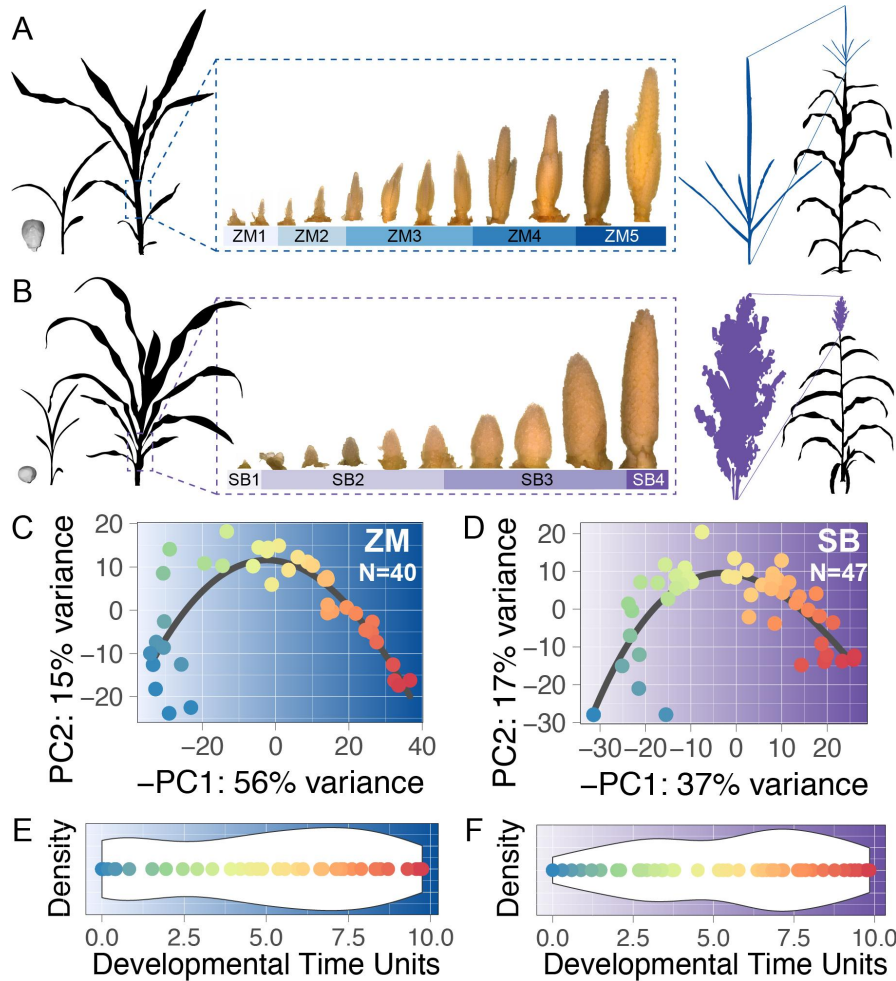

329

330 Figure 1. Capturing the transcriptional dynamics of inflorescence organogenesis.

331 (A and B) Maize (A) and sorghum (B) share many features during development, but ultimately  
332 lead to divergent terminal inflorescences (right). To capture the transcriptional features of this  
333 event, we dissected, imaged, and performed RNAseq on individual inflorescence primordia  
334 (dashed box).

335 (C and D) 5000 most-variable transcripts were used in a PCA to separate 40 maize tassel (C)  
336 and 47 sorghum panicle (D) RNAseq datasets. 2-knot smoothing splines (black line) were fitted  
337 to order and determine relative developmental progression between datasets (spectral colors).

338 (E and F) Reconstructed molecular ontogenies for maize (E) and sorghum (F) were separated  
339 into Developmental Time Units (DTU) from 0.0 to 10.0 with relatively even representation along  
340 this developmental trajectory, white ribbon = 95% kernel smoothing density.

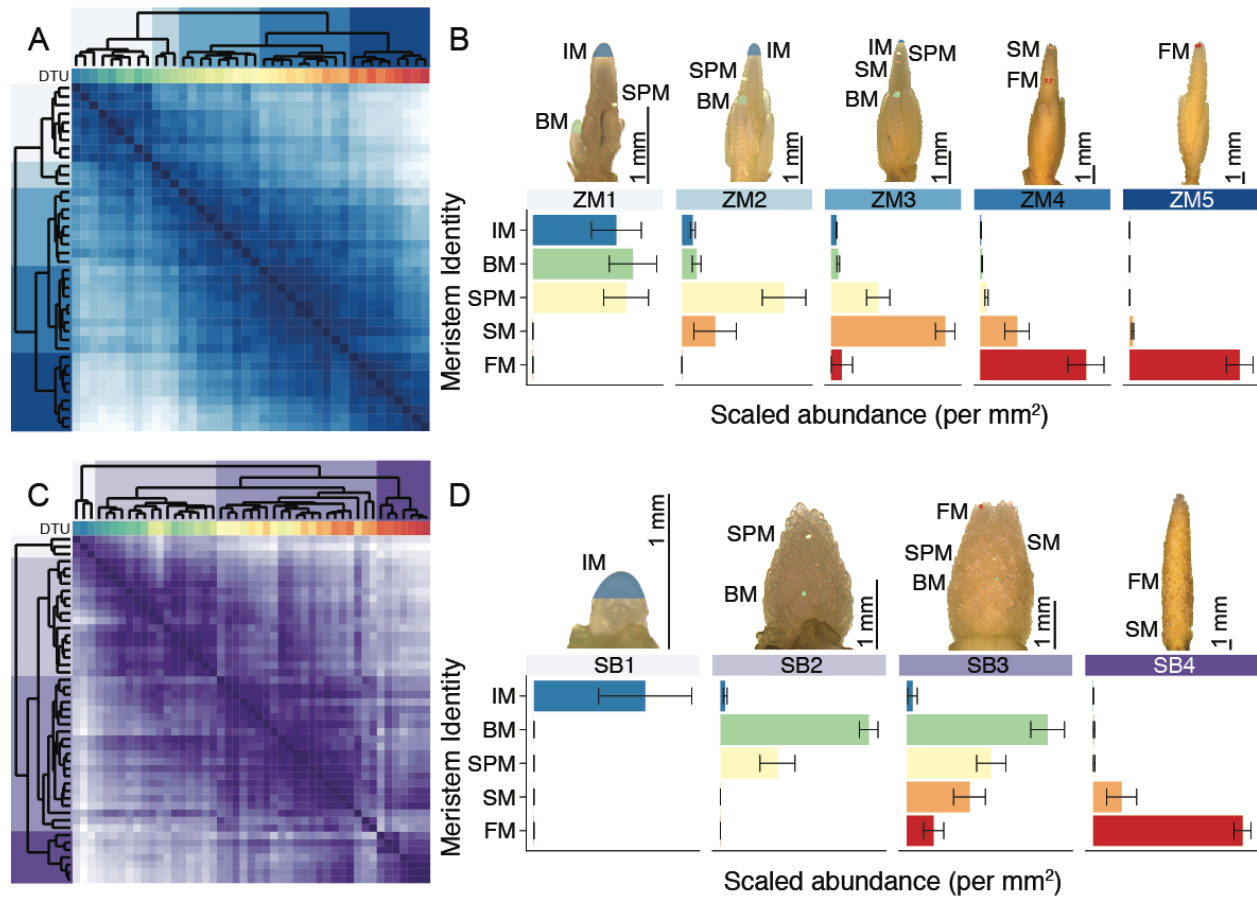

341

342 Figure 2. Transcriptional data identifies developmental stages correlated with changes  
 343 in tissue identity.

- 344 (A) Hierarchical clustering of immature maize tassel transcriptomes were sorted using DTU  
 345 values (spectral colors) to produce 5 maize tassel development stages, ZM1-ZM5 (blue  
 346 color bars). Pearson correlation matrix, deeper blue = higher correlation.
- 347 (B) Survey of meristem types collected from ZM1-ZM5 tassel primordia before RNAseq.  
 348 Average abundance of IMs (blue), BMs (green), SPMs (yellow), SMs (orange), and FM  
 349 (red) calculated per tassel area, mm<sup>2</sup>. ZM1 had highest proportion of indeterminate  
 350 identities, IM and BM. ZM2-ZM4 were each characterized by peak abundance of SPMs  
 351 (ZM2), SMs (ZM3), or FM (ZM4) in sequence. ZM5 primordia were almost entirely FM,  
 352 although the staging of floral organs was occluded by encasing glumes. Meristem  
 353 abundance ~ stage significant by MANOVA,  $F(20, 103.77) = 20.304$ ;  $p < 2.2e-16$ ; Wilk's  
 354  $\Lambda = 0.0050926$ . Univariate abundance of IM, BM, SPM, SM, and FM ~ stage each  
 355 significant by ANOVA, see Figure 2 Supplemental data 1 for test statistics. Error bars,  
 356 SE.
- 357 (C) Hierarchical clustering of immature sorghum panicle transcriptomes were sorted using  
 358 DTU values (spectral colors) to produce 4 sorghum panicle development stages, SB1-  
 359 SB4 (purple color bars). Pearson correlation matrix, deeper purple = higher correlation.

360 (D) Sampling of meristem types collected from SB1-SB4 panicle primordia before RNAseq.  
361 Average abundance of IMs (blue), BMs (green), SPMs (yellow), SMs (orange), and FMs  
362 (red) calculated per observed panicle area, mm<sup>2</sup>. SB1 was the only stage significantly  
363 comprised by the IM. SB2-SB4 were each characterized by BMs and SPMs (SB2), BMs,  
364 SPMs, and SMs (SB3), or SMs and FMs (SB4), in sequence. Meristem abundance ~  
365 stage significant by MANOVA,  $F(15, 97.021) = 17.202$ ;  $p < 2.2e-16$ ; Wilk's  $\Lambda = 0.027837$ .  
366 Univariate abundance of IM, BM, SPM, SM, and FM ~ stage each significant by ANOVA,  
367 see Figure 2 Supplemental data 1 for test statistics. Error bars, SE.

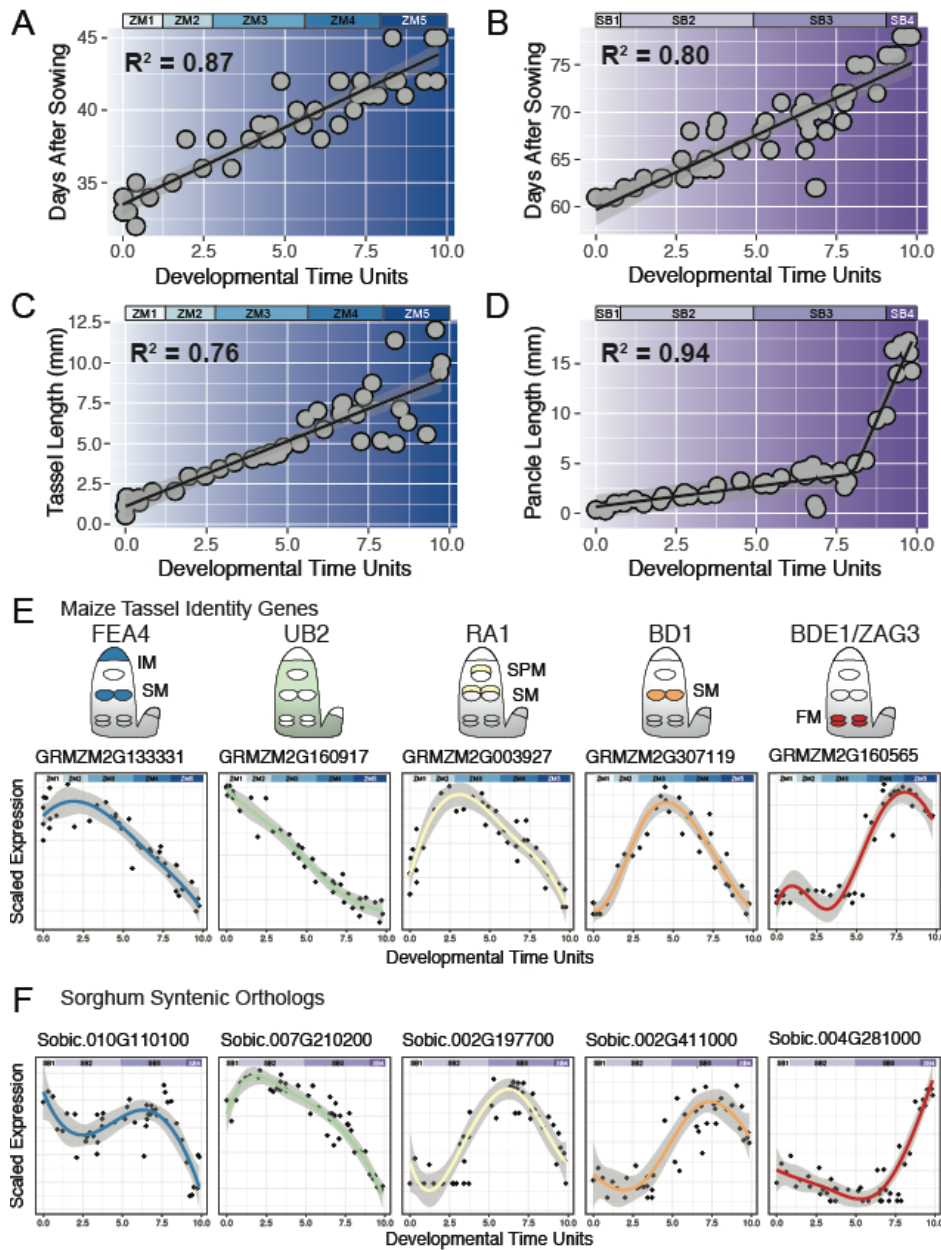

368

369 Figure 3. Measurements of sample age and expression of maize tassel genes and  
 370 sorghum syntenic orthologs is consistent with predicted molecular ontogeny and  
 371 predicted developmental stages.

372 (A and B) Calendar age (days after sowing, DAS) was significantly correlated with  
 373 transcriptionally-determined DTU in maize (A)  $DAS = -27.09 + 0.8262 (DTU)$ ;  $F(1, 38) = 272$ ;  $p$   
 374  $< 2.2e-16$  and sorghum (B)  $DAS = -27.60 + 0.4841 (DTU)$ ;  $F(1,45) = 145.1$ ;  $p = 1.121e-15$ .  
 375 Regression line, black. Standard deviation residuals, grey ribbon. Adjusted  $R^2$  labeled in black.

376 (C and D) Inflorescence length (mm) was significantly correlated with DTU in maize (C) length =  
 377  $-0.190 + 1.0022 (DTU)$ ;  $F(1, 38) = 160.7$ ;  $p = 3.193e-15$  and sorghum (B) length =  $0.661 +$

378 0.4089 ( DTU [0,8.003] ) + 7.1894 ( DTU [8.003, 10] ). Regression line, black. Standard  
379 deviation residuals, grey ribbon. Adjusted  $R^2$  labeled in black.

380 (E) Maize tassel identity genes with functional impacts on meristem identities and their  
381 localization during tassel development (schematic of IM, SPM, SM, and FM top to bottom, BM  
382 adjacent) correlate well with peak gene expression values observed in our reconstructed  
383 molecular ontogeny. 5-knot smoothing spline, colored line. Standard deviation residuals, grey  
384 ribbon. Stages ZM1-ZM5, blue color bars.

385 (F) Sorghum syntenic orthologs of maize tassel genes show similar trends of expression, but  
386 shifted rightward in our dataset. 5-knot smoothing spline, colored line. Standard deviation  
387 residuals, grey ribbon. Stages SB1-SB4, purple color bars.



A

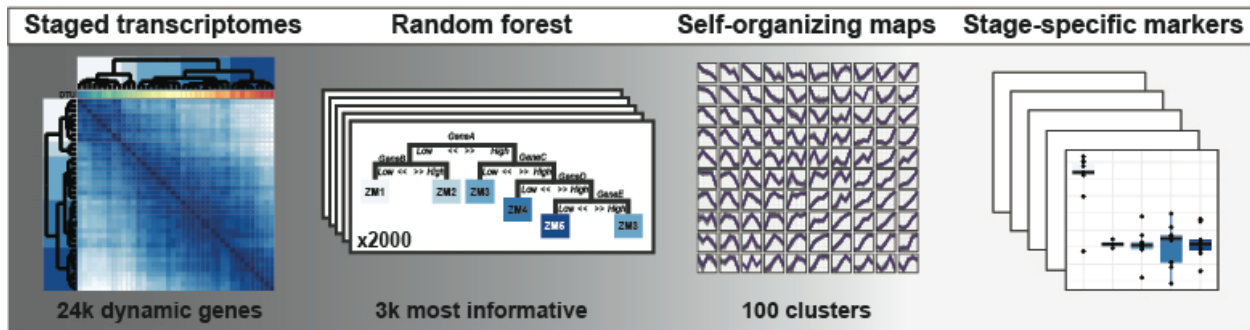

B

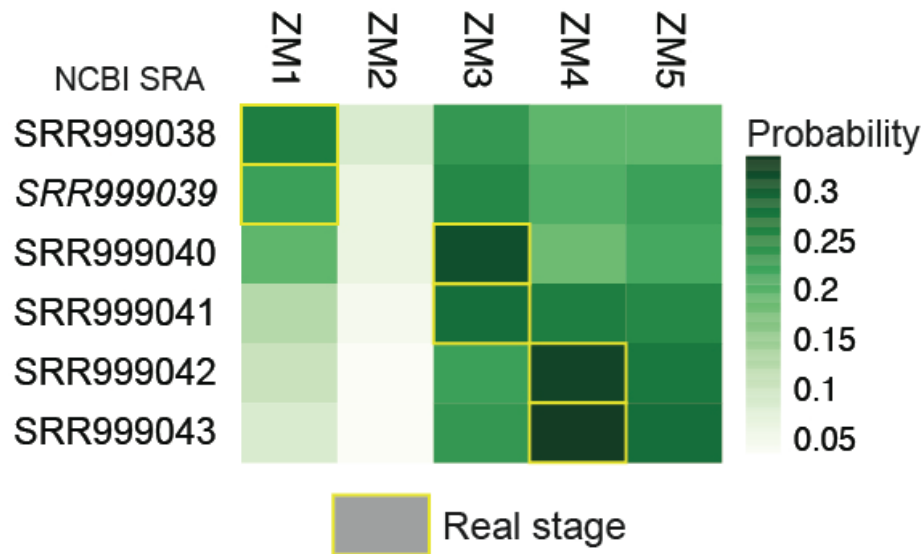

388

389 Figure 4. Random forest classifiers identify new inflorescence stage markers and  
 390 entrain a predictive RNAseq-based model

391 (A) Schematic for using Random forest models to isolate stage-specific marker genes. 24k  
 392 dynamically-expressed genes were used to entrain decision trees to determine sample  
 393 stage by gene expression values. Using an in-bag, out-of-bag validation approach, the  
 394 relative importance of each gene in determining stage could be calculated after 2000  
 395 iterations of tree-building. The top 3000 most informative genes were selected for  
 396 expression profile clustering, via self-organizing maps. Genes included in clusters with  
 397 stage specific expression profiles were considered as new molecular markers of maize  
 398 tassel and sorghum panicle developmental stage (see supplemental tables ?? and  
 399 supplemental figures).

400 (B) Our entrained Random forest model correctly classified 5 of 6 staged, pooled maize  
 401 immature maize tassel RNAseq datasets available in the NCBI short read archive.  
 402 Probability of stage ZM1-ZM5, green. Actual stage inferred by reported tassel size  
 403 range, yellow box.

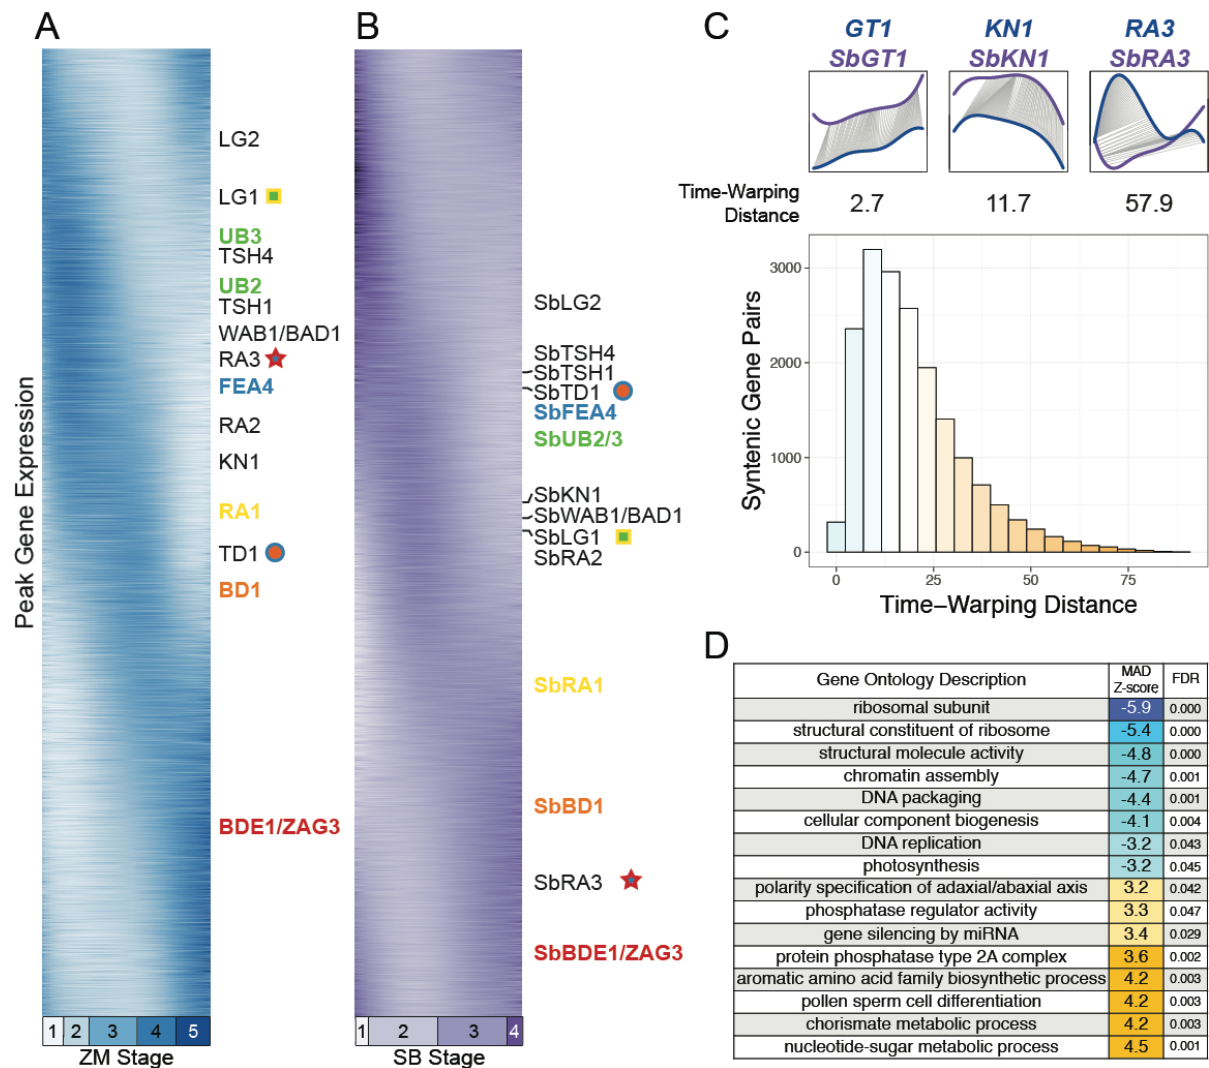

404

405 Figure 5. Phased gene expression schedules and Dynamic Time Warping (DTW)  
406 identify species-specific and species-shared expression profiles.

407 (A and B) Maize (A) and sorghum (B) genes sorted by time of peak expression. Dynamically  
408 expressed genes with known tassel architecture phenotypes and their sorghum syntenic  
409 orthologs annotated. Key meristem identity genes, blue = IM associated, green = BM  
410 associated, yellow = SPM associated, orange = SM associated, red = FM associated. Syntenic  
411 ortholog pairs with notable changes in expression sequence denoted with symbols, closest ZM  
412 marker gene = symbol inner color, closest SB gene = symbol outer color.

413 (C) DTW aligns gene expression profiles allowing for gaps, compression, and expansion,  
414 yielding a DTW distance metric for each alignment. Top, left to right, example low, near-median,  
415 and high DTW distance syntenic gene pairs. Bottom, histogram of DTW distance scores for 18k  
416 maize-sorghum syntenic gene ortholog pairs. Blue = below median DTW distance. White =  
417 median DTW distance (16.625). Orange = high DTW distance.

418 (D) Parametric GO enrichment analysis of DTW distance median absolute distance (MAD)  
419 using maize gene annotations identified gene categories with similar (blue, negative MAD Z-  
420 score) and dissimilar (orange, positive MAD Z-score) gene expression profiles between maize  
421 and sorghum syntenic gene pairs.

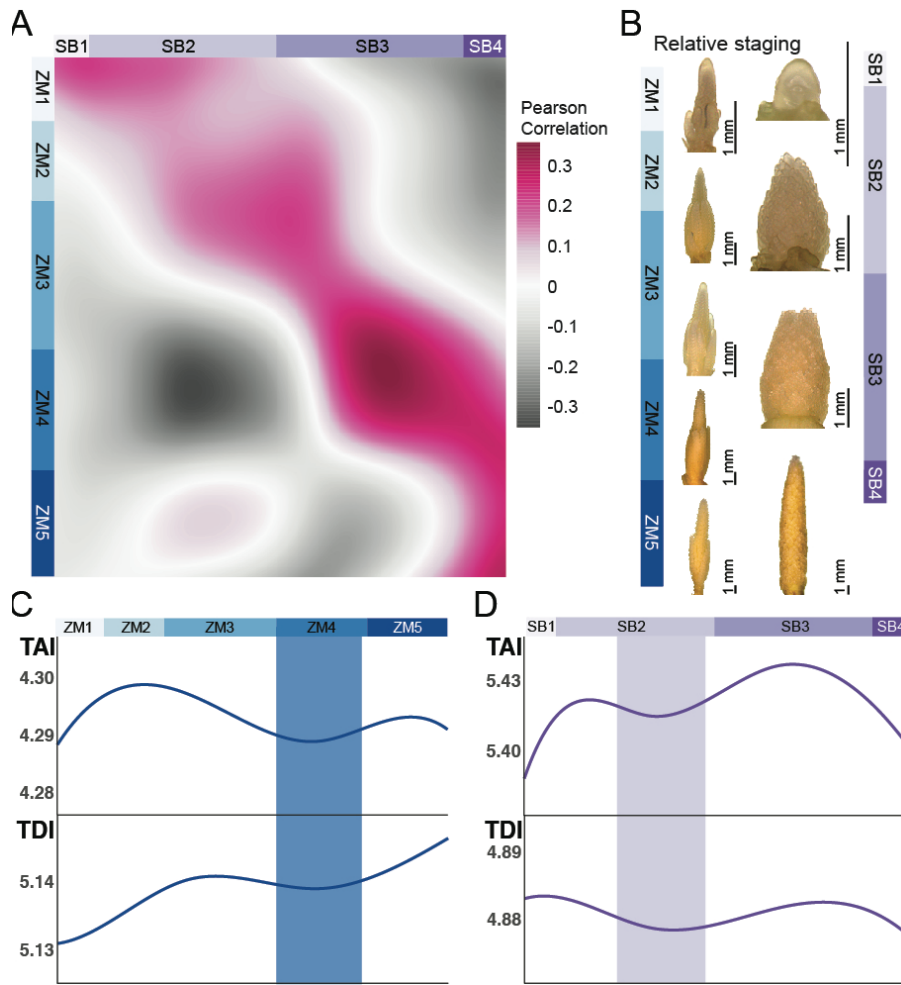

422

423 Figure 6. Synchronizing maize and sorghum inflorescence development finds dissimilar  
424 hourglass-like developmental stages, as expected in an inverse-hourglass model of  
425 development.

426 (A) Correlation between maize and sorghum inflorescence molecular ontogenies. Peak  
427 correlation during ZM4 and SB3, both times with high FM activity, and minimal correlation during  
428 ZM4 and SB2. Maize stages, ZM1-ZM5 vertical blue color bars. Sorghum stages, SB1-SB4  
429 horizontal purple color bars. Pearson correlation, positive = pink, no correlation = white,  
430 negative = grey.

431 (B) Tracking peak correlation between maize and sorghum expression dynamics determined  
432 relative staging. Maize stages, ZM1-ZM5 blue color bars. Sorghum stages, SB1-SB4 purple  
433 color bars.

434 (C and D) Signatures of anciently conserved transcriptional, developmental hourglass-like  
435 stages by phylostratigraphy (TAI) and codon divergence stratigraphy (TDI); maize ZM4, blue  
436 vertical band; sorghum late SB2, purple vertical band. Comparing these stages by overall  
437 transcriptome similarity (A) suggests an inverse-hourglass relationship between maize tassel  
438 and sorghum panicle development. (C) TAI significant by flat line test,  $p = 3.22e-05$ , TDI

439 significant by flat line test,  $p = 2.68e-07$ . (D) TAI significant by flat line test,  $p = 1.61e-45$ , TDI  
440 significant by flat line test,  $p = 5.69e-03$ .

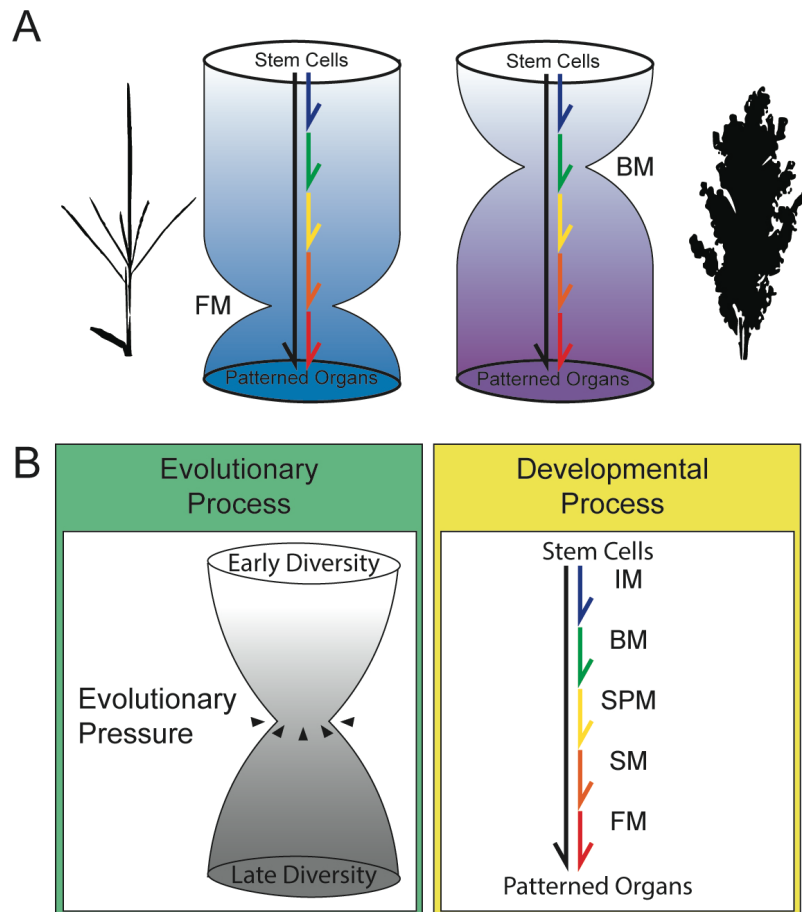

441

442 Figure 7. Differences in hourglass-like stages in maize and sorghum inflorescences  
443 suggest that evolutionary and overall developmental processes can be uncoupled.

444 (A) Hourglass-like stages occur during maize tassel development when determinant floral  
445 meristems, FMs are most abundant (left), but also during sorghum panicle development  
446 when indeterminant branch meristems, BMs are most abundant (right). Overall  
447 signatures of inflorescence development are similar, arrows.

448 (B) Observed separation in hourglass-like stage definition by evolution, where evolutionary  
449 pressure restricts gene activity by purifying selection (left), yet organogenic pathways  
450 are independently refined (right).

## 451 Acknowledgements

452 We thank Z. Lemmon and C. Marklez for early discussions that lead to this work. SL is  
453 supported by NSF IOS 1612268 NPGI Postdoctoral Fellowship. This work used the Vincent J.  
454 Coates Genomics Sequencing Laboratory at UC Berkeley, supported by NIH S10 OD018174  
455 Instrumentation Grant.

## 456 Methods

### 457 Tissue collection, imaging, and RNA profiling

458 *Zea mays* subsp. *mays* inbred B73 (PI 550473) and *Sorghum bicolor* inbred BTx623 (PI  
459 564163) were grown in three staggered plantings in greenhouse conditions. Individual kernels  
460 were sown in 36-well starter trays every week for three weeks. Germinated maize seedlings  
461 were transplanted to 2-gallon pots, 4-to-a-pot after one week. Germinated sorghum seedlings  
462 were transplanted to 2-gallon pots, 4-to-a-pot after two weeks. Plants from one pot were  
463 harvested from 2-4 PM every day from all three plantings from 30 DAS to 80 DAS as needed.

464 Plants were dissected with the aid of a Leica MZ 16 F stereoscope and imaged using a  
465 Teledyne QImaging MicroPublisher 6 CCD camera at 1x and 5x magnification. Leaves were  
466 removed with a scalpel to reveal the developing primordium. During imaging, plants were  
467 ranked 1-5 stars based on the integrity of the primordium, areas of damage, dust, etc. Only  
468 samples with 4-5 stars were used to produce RNA and cDNA sequencing libraries. Immediately  
469 after imaging, each primordium was sealed in a 1.5 ml eppendorf tube containing 4 chromium  
470 beads and flash frozen in liquid nitrogen while other plants were harvested. Dissections that  
471 required more than 30 minutes to complete were discarded to reduce the chance of tissue  
472 damage related transcriptional changes.

473 After harvest, tubes were removed from liquid nitrogen and homogenized using a Retsch MM  
474 301 tissue homogenizer (freq = 30 Hz, duration = 30 sec), then returned to liquid nitrogen. RNA  
475 was extracted using TRIzol (Invitrogen), precipitated using 0.5M NaCl + 2-propyl alcohol,  
476 washed with 70% ethanol, and resuspended in nuclease-free water. RNA was quantified using  
477 a QuBit BR-RNA kit and quality was evaluated on a 1% agarose gel in 1x TAE buffer.

478 Approximately 1 ug of RNA was used as input to the NEB Ultra II RNA sequencing library kit for  
479 illumina (New England Biolabs, NEB catalogue number: E7775L, E7335S, E7500S, E7710S,  
480 E7730S). Multiplexed library synthesis was carried out according to manufacturer's  
481 specifications, making use of optional poly-dT bead mRNA selection (NEB E7490L) and 7-cycle  
482 PCR amplification as specified. Library quality and quantity was verified by Agilent DNA  
483 BioAnalyzer and qPCR by the QB3 Vincent J. Coates Genomics Sequencing Laboratory.

484  
485 **RNA sequencing, alignment, and normalization**

486 Maize and sorghum libraries were added in equimolar mixes and sequenced separately, each  
487 using one lane of an Illumina HiSeq4000 with 100 bp single-end sequencing chemistry.  
488 Sequence quality was evaluated using FastQC and MultiQC. Illumina adapter sequences were  
489 trimmed using Trimmomatic. Reads were aligned to the maize B73 AGPv3.30 or sorghum  
490 BTx623 v3.0.1 genome using HiSAT2. Aligned reads were counted using a union-exon  
491 approach with HTseq-Counts to the B73 AGPv3.30 gene set or BTx623 v3.1.1 gene set. Raw  
492 counts were normalized using variance-stabilizing normalization with DESeq2. Genes with less  
493 than 5 reads per million or detected in less than 39 sequencing libraries were not considered in  
494 subsequent analysis.

#### 495 **Sample pseudotime indexing and stage determination**

496 We used row variance to identify the top 1500 most variable genes and separate samples  
497 based on a principal component analysis (PCA) for both maize and sorghum datasets. A 3-knot  
498 b-spline was fit to component 1 and component 2. Each sample was assigned a location on the  
499 b-spline by minimizing the Euclidean distance between the spline and the real expression  
500 dataset. The rank and distance along the b-spline was used to calculate a Developmental Time  
501 Units (DTU) value from 0.0 to 10.0.

502 The complete gene expression matrix was used for hierarchical clustering by average linkage  
503 and produce a dendrogram of between-sample relationships with R dendextend (Galili, 2015).  
504 DTU was used to sort the branches. Stages were determined by clustering distance.

#### 505 **Image analysis**

506 Tiled 1x and 5x images from harvested tissues used for RNAseq were analyzed using ImageJ  
507 (Schneider et al., 2012). Meristem tissue identity was determined by appearance, counted, and  
508 quantified using the count objects tool. Binary thresholding was used to determine the area of  
509 the total inflorescence silhouette and normalize meristem abundance by inflorescence size. Late  
510 stage sorghum samples were too large to survey completely, so we quantified 5 randomly  
511 positioned image subsamples and used the subsample silhouette to normalize abundance by  
512 size.

#### 513 **Random forest modeling, prediction, and clustering**

514 The randomForest package for R was used to entrain a random forest model to predict  
515 inflorescence stage with an unfiltered, variance-stabilized gene expression matrix (Liaw and  
516 Wiener, 2001). The optimal number of trees and number of variables at each split point were  
517 determined empirically by minimizing out-of-bag error rates, maize: ntree=2000, mtry=106;  
518 sorghum: ntree=2000, mtry=4.

519 B73 tassel datasets were accessed from the NCBI SRA (BioProject PRJNA219741; accession  
520 SRR999038, SRR999039, SRR999040, SRR999041, SRR999042, SRR999043). Tassel stage  
521 was predicted using the entrained random forest and aggregated stage assignment probabilities  
522 were reported.

523



524 The decrease in accuracy for each gene feature during random forest model entrainment was  
525 used to identify the top 2500 most influential genes. These most influential genes were  
526 clustered using self-organizing maps with a 10 x 10 hexagonal grid and 50,000 iterative steps  
527 (R package kohonen; Wehrens and Buydens, 2007; Wehrens and Kruisselbrink, 2018).

528

### 529 **Expression comparison of syntenic orthologs**

530 The variance stabilized gene expression matrix was used to fit a 5-knot b-spline for each maize  
531 and sorghum gene. Each gene's fitted curve was interpolated into 1,000 points along its  
532 expression trajectory to allow for smooth, continuous comparisons. To produce phasigrams  
533 (Levin et al., 2016), we performed PCA on z-scaled expression values for each gene. When  
534 plotted, component 1 and component 2 formed a circle. We used the atan2 function to order  
535 genes based on their time of peak expression. Maize genes and their sorghum syntenic  
536 orthologs (Zhang et al., 2017) were identified as annotations on a vertical heatmap based on  
537 atan2 ordering.

538 Dynamic time warping (DTW) was performed on maize-sorghum syntenic ortholog pairs using  
539 z-scaled expression values and the R package dtw (Giorgino, 2009). Median absolute deviation  
540 was used for parametric gene enrichment tests (Tian et al., 2017) of species-shared and  
541 species-specific expression patterns.

### 542 **Evolutionary expression analysis**

543 We calculated maize and sorghum peptide phylostrata from the B73 AGPv3.30 and BTx623  
544 v3.1.1 gene sets with the R package phylostratr (Arendsee et al., 2019). Using the NCBI tree of  
545 life, we selected 6 representative genomes at each node, as well as adding recommended  
546 diverse prokaryotic taxa, for a total of 127 genomes in each analysis. We performed protein  
547 BLASTs (NCBI BLAST+) against this library of genomes with maize and again with sorghum  
548 peptides. TAI was calculated using variance-stabilized RPKM gene expression values with  
549 myTAI (Drost et al., 2018). For gene models with multiple predicted peptides, TAI was  
550 calculated with the most conserved phylostrata assigned to that locus.

551 We calculated maize and sorghum codon divergence phylostrata by performing reciprocal best  
552 BLAST (e-value cutoff 1E-5) for CDS from each species against the *Setaria italica* v2.2 CDS  
553 with the R package orthologr (Drost et al., 2015). Amino acids were aligned using the  
554 Needleman-Wunsch algorithm and then codon aligned with PAL2NAL before calculating  
555 substitution rates and separating into equal deciles. TDI was calculated using variance-  
556 stabilized RPKM gene expression values with myTAI (Drost et al., 2018). For gene models with  
557 multiple predicted peptides, TAI was calculated with the most conserved codon divergence  
558 strata assigned to that locus.

## 559 **Works Cited**

560 Ahmad Dar R, Ahmad Dar E, Kaur A, Gupta Phutela U. 2018. Sweet sorghum-a promising  
561 alternative feedstock for biofuel production. *Renewable Sustainable Energy Rev* **82**:4070–

- 562 4090.
- 563 Akhshabi S, Sarda S, Dovrolis C, Yi S. 2014. An explanatory evo-devo model for the  
564 developmental hourglass. *F1000Res* **3**:156.
- 565 Anavy L, Levin M, Khair S, Nakanishi N, Fernandez-Valverde SL, Degan BM, Yanai I. 2014.  
566 BLIND ordering of large-scale transcriptomic developmental timecourses. *Development*  
567 **141**:1161–1166.
- 568 Arendsee Z, Li J, Singh U, Seetharam A, Dorman K, Wurtele ES. 2019. phylostratr: A  
569 framework for phylostratigraphy. *Bioinformatics*. doi:10.1093/bioinformatics/btz171
- 570 Bommert P, Lunde C, Nardmann J, Vollbrecht E, Running M, Jackson D, Hake S, Werr W.  
571 2005. thick tassel dwarf1 encodes a putative maize ortholog of the Arabidopsis CLAVATA1  
572 leucine-rich repeat receptor-like kinase. *Development* **132**:1235–1245.
- 573 Bortiri E, Chuck G, Vollbrecht E, Rocheford T, Martienssen R, Hake S. 2006. ramosa2 encodes  
574 a LATERAL ORGAN BOUNDARY domain protein that determines the fate of stem cells in  
575 branch meristems of maize. *Plant Cell* **18**:574–585.
- 576 Carroll SB. 2008. Evo-devo and an expanding evolutionary synthesis: a genetic theory of  
577 morphological evolution. *Cell* **134**:25–36.
- 578 Cheng X, Hui JHL, Lee YY, Wan Law PT, Kwan HS. 2015. A “developmental hourglass” in  
579 fungi. *Mol Biol Evol* **32**:1556–1566.
- 580 Chuck G, Bortiri E. 2010. The unique relationship between tsh4 and ra2 in patterning floral  
581 phytomers. *Plant Signal Behav* **5**:979–981.
- 582 Chuck G, Muszynski M, Kellogg E, Hake S, Schmidt RJ. 2002. The control of spikelet meristem  
583 identity by the branched silkless1 gene in maize. *Science* **298**:1238–1241.
- 584 Chuck GS, Brown PJ, Meeley R, Hake S. 2014. Maize SBP-box transcription factors  
585 unbranched2 and unbranched3 affect yield traits by regulating the rate of lateral primordia  
586 initiation. *Proc Natl Acad Sci U S A* **111**:18775–18780.
- 587 Drost H-G, Bellstädt J, Ó'Maoiléidigh DS, Silva AT, Gabel A, Weinholdt C, Ryan PT, Dekkers  
588 BJW, Bentsink L, Hilhorst HWM, Ligterink W, Wellmer F, Grosse I, Quint M. 2016. Post-  
589 embryonic Hourglass Patterns Mark Ontogenetic Transitions in Plant Development. *Mol*  
590 *Biol Evol* **33**:1158–1163.
- 591 Drost H-G, Gabel A, Grosse I, Quint M. 2015. Evidence for active maintenance of  
592 phylotranscriptomic hourglass patterns in animal and plant embryogenesis. *Mol Biol Evol*  
593 **32**:1221–1231.
- 594 Drost H-G, Gabel A, Liu J, Quint M, Grosse I. 2018. myTAI: evolutionary transcriptomics with R.  
595 *Bioinformatics* **34**:1589–1590.
- 596 Duboule D. 1994. Temporal colinearity and the phylotypic progression: a basis for the stability of  
597 a vertebrate Bauplan and the evolution of morphologies through heterochrony.  
598 *Development* **120**:135–142.
- 599 Eveland AL, Goldshmidt A, Pautler M, Morohashi K, Liseron-Monfils C, Lewis MW, Kumari S,  
600 Hirag S, Yang F, Unger-Wallace E, Olson A, Hake S, Vollbrecht E, Grotewold E, Ware D,  
601 Jackson D. 2014. Regulatory modules controlling maize inflorescence architecture.  
602 *Genome Res* **24**:431–443.
- 603 Galili T. 2015. dendextend: an R package for visualizing, adjusting and comparing trees of  
604 hierarchical clustering. *Bioinformatics* **31**:3718–3720.
- 605 Gallavotti A, Long JA, Stanfield S, Yang X, Jackson D, Vollbrecht E, Schmidt RJ. 2010. The  
606 control of axillary meristem fate in the maize ramosa pathway. *Development* **137**:2849–  
607 2856.
- 608 Giorgino T. 2009. Computing and Visualizing Dynamic Time Warping Alignments in R: The dtw  
609 Package. *Journal of Statistical Software, Articles* **31**:1–24.
- 610 Gould SJ. 2003. Ontogeny and phylogeny. Cambridge, MA: Belknap Press of Harvard  
611 University Press.
- 612 Hubbard L, McSteen P, Doebley J, Hake S. 2002. Expression patterns and mutant phenotype of

- 613 teosinte branched1 correlate with growth suppression in maize and teosinte. *Genetics*  
614 **162**:1927–1935.
- 615 Hufford MB, Xu X, van Heerwaarden J, Pyhäjärvi T, Chia J-M, Cartwright RA, Elshire RJ,  
616 Glaubitz JC, Guill KE, Kaepler SM, Lai J, Morrell PL, Shannon LM, Song C, Springer NM,  
617 Swanson-Wagner RA, Tiffin P, Wang J, Zhang G, Doebley J, McMullen MD, Ware D,  
618 Buckler ES, Yang S, Ross-Ibarra J. 2012. Comparative population genomics of maize  
619 domestication and improvement. *Nat Genet* **44**:808–811.
- 620 Jones FC, Grabherr MG, Chan YF, Russell P, Mauceli E, Johnson J, Swofford R, Pirun M, Zody  
621 MC, White S, Birney E, Searle S, Schmutz J, Grimwood J, Dickson MC, Myers RM, Miller  
622 CT, Summers BR, Knecht AK, Brady SD, Zhang H, Pollen AA, Howes T, Amemiya C,  
623 Baldwin J, Bloom T, Jaffe DB, Nicol R, Wilkinson J, Lander ES, Di Palma F, Lindblad-Toh  
624 K, Kingsley DM. 2012. The genomic basis of adaptive evolution in threespine sticklebacks.  
625 *Nature* **484**:55–61.
- 626 Kalinka AT, Varga KM, Gerrard DT, Preibisch S, Corcoran DL, Jarrells J, Ohler U, Bergman  
627 CM, Tomancak P. 2010. Gene expression divergence recapitulates the developmental  
628 hourglass model. *Nature* **468**:811–814.
- 629 Kaplan DR, Cooke TJ. 1997. Fundamental Concepts in the Embryogenesis of Dicotyledons: A  
630 Morphological Interpretation of Embryo Mutants. *Plant Cell* **9**:1903–1919.
- 631 Kellogg EA, Camara PEAS, Rudall PJ, Ladd P, Malcomber ST, Whipple CJ, Doust AN. 2013.  
632 Early inflorescence development in the grasses (Poaceae). *Front Plant Sci* **4**:250.
- 633 Lai X, Yan L, Lu Y, Schnable JC. 2017. Largely unlinked gene sets targeted by selection for  
634 domestication syndrome phenotypes in maize and sorghum. *Plant J.* doi:10.1111/tpj.13806
- 635 Lemmon ZH, Park SJ, Jiang K, Van Eck J, Schatz MC, Lippman ZB. 2016. The evolution of  
636 inflorescence diversity in the nightshades and heterochrony during meristem maturation.  
637 *Genome Res* **26**:1676–1686.
- 638 Levin M, Anavy L, Cole AG, Winter E, Mostov N, Khair S, Senderovich N, Kovalev E, Silver DH,  
639 Feder M, Fernandez-Valverde SL, Nakanishi N, Simmons D, Simakov O, Larsson T, Liu S-  
640 Y, Jerafi-Vider A, Yaniv K, Ryan JF, Martindale MQ, Rink JC, Arendt D, Degnan SM,  
641 Degnan BM, Hashimshony T, Yanai I. 2016. The mid-developmental transition and the  
642 evolution of animal body plans. *Nature* **531**:637–641.
- 643 Levin M, Hashimshony T, Wagner F, Yanai I. 2012. Developmental milestones punctuate gene  
644 expression in the *Caenorhabditis* embryo. *Dev Cell* **22**:1101–1108.
- 645 Lewis MW, Bolduc N, Hake K, Htike Y, Hay A, Candela H, Hake S. 2014. Gene regulatory  
646 interactions at lateral organ boundaries in maize. *Development* **141**:4590–4597.
- 647 Liaw A, Wiener M. 2001. Classification and Regression by RandomForest.
- 648 Lin Z, Li X, Shannon LM, Yeh C-T, Wang ML, Bai G, Peng Z, Li J, Trick HN, Clemente TE,  
649 Doebley J, Schnable PS, Tuinstra MR, Tesso TT, White F, Yu J. 2012. Parallel  
650 domestication of the Shattering1 genes in cereals. *Nat Genet* **44**:720–724.
- 651 Minelli A. 2009. Forms of becoming : the evolutionary biology of development. Princeton :  
652 Princeton University Press, c2009.
- 653 Morris GP, Ramu P, Deshpande SP, Hash CT, Shah T, Upadhyaya HD, Riera-Lizarazu O,  
654 Brown PJ, Acharya CB, Mitchell SE, Harriman J, Glaubitz JC, Buckler ES, Kresovich S.  
655 2013. Population genomic and genome-wide association studies of agroclimatic traits in  
656 sorghum. *Proc Natl Acad Sci U S A* **110**:453–458.
- 657 Pautler M, Eveland AL, LaRue T, Yang F, Weeks R, Lunde C, Je BI, Meeley RB, Komatsu M,  
658 Vollbrecht E, Sakai H, Jackson D. 2015. FASCIATED EAR4 Encodes a bZIP Transcription  
659 Factor That Regulates Shoot Meristem Size in Maize. *The Plant Cell Online*  
660 **27**:tpc.114.132506.
- 661 Quint M, Drost H-G, Gabel A, Ullrich KK, Bönn M, Grosse I. 2012. A transcriptomic hourglass in  
662 plant embryogenesis. *Nature* **490**:98–101.
- 663 Roux J, Rosikiewicz M, Robinson-Rechavi M. 2015. What to compare and how: Comparative

- 664 transcriptomics for Evo-Devo. *J Exp Zool B Mol Dev Evol* **324**:372–382.
- 665 Satoh-Nagasawa N, Nagasawa N, Malcomber S, Sakai H, Jackson D. 2006. A trehalose  
666 metabolic enzyme controls inflorescence architecture in maize. *Nature* **441**:227–230.
- 667 Scheubert L, Schmidt R, Repsilber D, Lustrek M, Fuellen G. 2011. Learning biomarkers of  
668 pluripotent stem cells in mouse. *DNA Res* **18**:233–251.
- 669 Schnable JC, Springer NM, Freeling M. 2011. Differentiation of the maize subgenomes by  
670 genome dominance and both ancient and ongoing gene loss. *Proc Natl Acad Sci U S A*  
671 **108**:4069–4074.
- 672 Schneider CA, Rasband WS, Eliceiri KW. 2012. NIH Image to ImageJ: 25 years of image  
673 analysis. *Nat Methods* **9**:671–675.
- 674 Steeves TA, Sussex IM. 1972. Patterns in plant development. Englewood Cliffs, N.J.: Prentice-  
675 Hall.
- 676 Studer A, Zhao Q, Ross-Ibarra J, Doebley J. 2011. Identification of a functional transposon  
677 insertion in the maize domestication gene *tb1*. *Nat Genet* **43**:1160–1163.
- 678 Thompson B. 2014. Chapter Nine - Genetic and Hormonal Regulation of Maize Inflorescence  
679 Development In: Fornara F, editor. *Advances in Botanical Research*. Academic Press. pp.  
680 263–296.
- 681 Thompson BE, Bartling L, Whipple C, Hall DH, Sakai H, Schmidt R, Hake S. 2009. bearded-ear  
682 encodes a MADS box transcription factor critical for maize floral development. *Plant Cell*  
683 **21**:2578–2590.
- 684 Tian T, Liu Y, Yan H, You Q, Yi X, Du Z, Xu W, Su Z. 2017. agriGO v2.0: a GO analysis toolkit  
685 for the agricultural community, 2017 update. *Nucleic Acids Res* **45**:W122–W129.
- 686 Vollbrecht E, Springer PS, Goh L, Buckler ES 4th, Martienssen R. 2005. Architecture of floral  
687 branch systems in maize and related grasses. *Nature* **436**:1119–1126.
- 688 Wehrens R, Buydens L. 2007. Self- and Super-organizing Maps in R: The kohonen Package.  
689 *Journal of Statistical Software, Articles* **21**:1–19.
- 690 Wehrens R, Kruisselbrink J. 2018. Flexible Self-Organizing Maps in kohonen 3.0. *Journal of*  
691 *Statistical Software, Articles* **87**:1–18.
- 692 Xie KT, Wang G, Thompson AC, Wucherpfennig JI, Reimchen TE, MacColl ADC, Schluter D,  
693 Bell MA, Vasquez KM, Kingsley DM. 2019. DNA fragility in the parallel evolution of pelvic  
694 reduction in stickleback fish. *Science* **363**:81–84.
- 695 Yanai I. 2018. Development and Evolution through the Lens of Global Gene Regulation. *Trends*  
696 *Genet* **34**:11–20.
- 697 Zhang Y, Ngu DW, Carvalho D, Liang Z, Qiu Y, Roston RL, Schnable JC. 2017. Differentially  
698 Regulated Orthologs in Sorghum and the Subgenomes of Maize. *Plant Cell* **29**:1938–1951.
- 699 Zhou Y, Srinivasan S, Mirnezami SV, Kusmec A, Fu Q, Attigala L, Salas Fernandez MG,  
700 Ganapathysubramanian B, Schnable PS. 2019. Semiautomated Feature Extraction from  
701 RGB Images for Sorghum Panicle Architecture GWAS. *Plant Physiol* **179**:24–37.
